# Supplementary material for: Melt-diffusion and ion-exchange methods: self-triggered O-rich groups on the surface of acetylene black using S-EDA solution to boost its sulfur content for lithium–sulfur batteries
Source: Royal Society of Chemistry journal article supplement (doi:10.1039/d0nr08399b), 2021-01-01
Supplement: d0nr08399b1.pdf [file d0nr08399b1.pdf]

## From Melt-diffusion to Ion-exchange method: Self-triggered Rich-O Group on the Surface of Acetylene black by Using S-EDA Solution to Boosting the Sulfur Content for Lithium-Sulfur Batteries

Chao Sun <sup>a, b, c</sup>, Chunxi Hai <sup>a, b\*</sup>, Yuan Zhou <sup>a, b\*</sup>, Yue Shen <sup>a, b\*</sup>, Xiang Li <sup>a, b</sup>, Yanxia Sun <sup>a, b</sup>, Guotai Zhang <sup>a, b, c</sup>, Jinbo Zeng <sup>a, b</sup>, Shengde Dong <sup>a, b, c</sup>, Xiufeng Ren <sup>a, b</sup>, Guiping Peng <sup>a, b, c</sup>, Shengdi Zhang <sup>a, b, c</sup>,

*a. Key Laboratory of Comprehensive and Highly Efficient Utilization of Salt Lake Resources, Qinghai Institute of Salt Lakes, Chinese Academy of Sciences, 18<sup>th</sup> Xinning Road, Xining 810008, China*

*b. Key Laboratory of Salt Lake Resources Chemistry of Qinghai Province, 18<sup>th</sup> Xinning Road, Xining 810008, China*

*c. University of Chinese Academy of Sciences, Beijing 100049, China*

*\* Corresponding author.*

*\*E-mail: [haicx@isl.ac.cn](mailto:haicx@isl.ac.cn)*

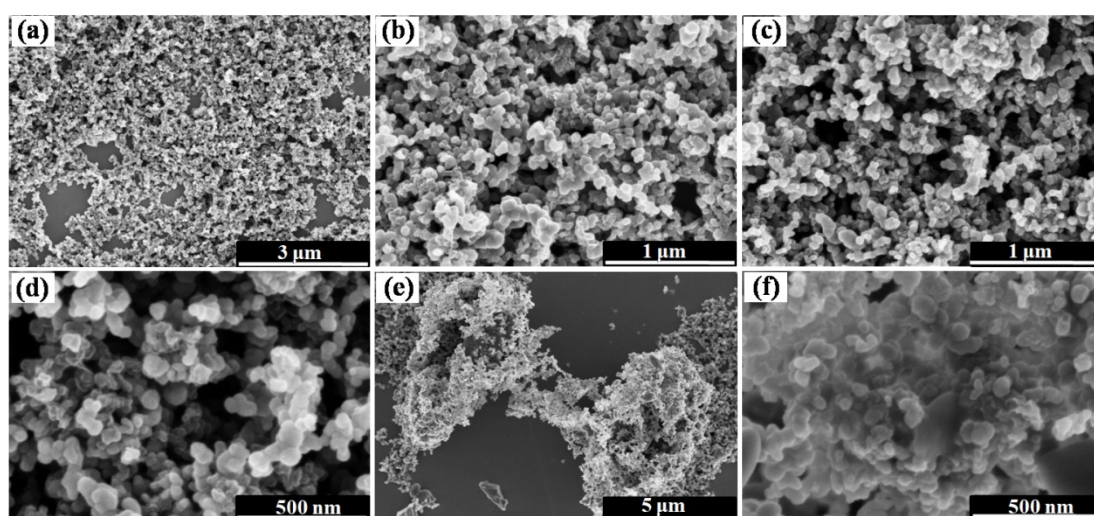

**Fig. S1** (a)-(b) SEM of Acetylene black, (c)-(d) SEM of Acetylene black@Mp-S, (e)-(f) SEM of Acetylene black@Re-S.

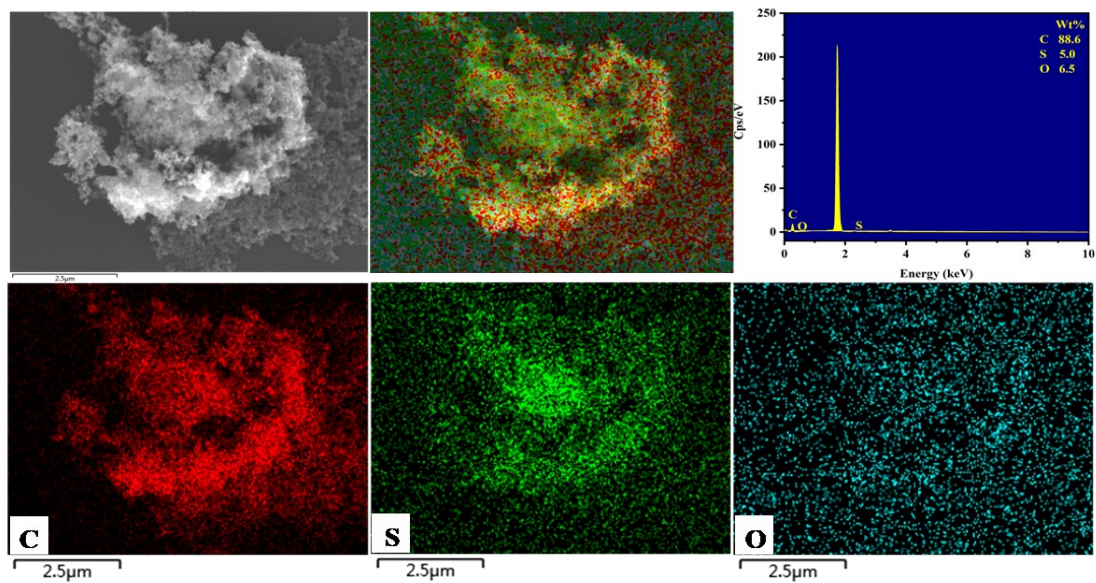

**Fig. S2** The elemental mapping and energy dispersive spectroscopy (EDS) area analysis of Acetylene black@Re-S.

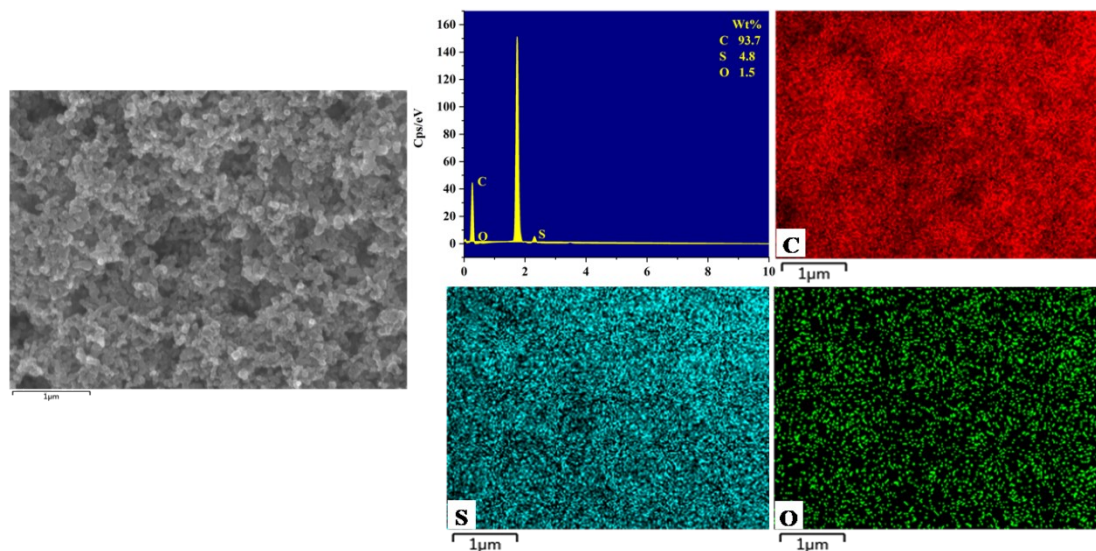

**Fig. S3** The elemental mapping and energy dispersive spectroscopy (EDS) area analysis of Acetylene black@Mp-S.

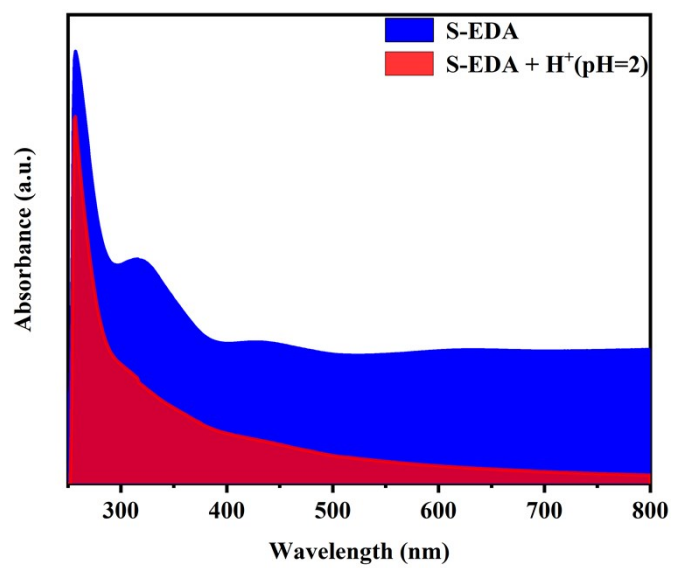

**Fig. S4** UV-vis spectrum of the S-EDA solution and S-EDA + H<sup>+</sup> (pH=2) solution.

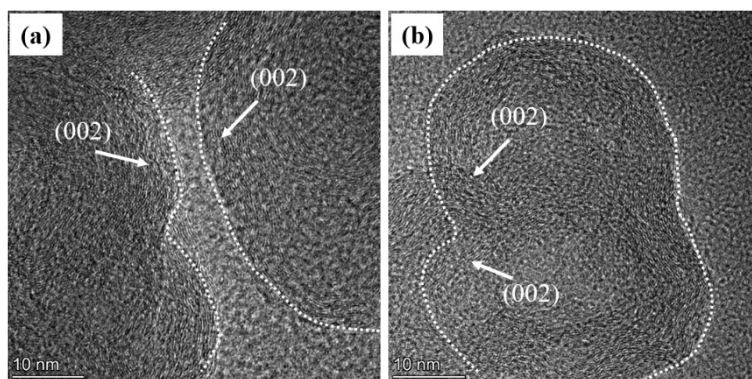

**Fig. S5** HR-TEM images. HR-TEM images. (a) Acetylene black@Mp-S, (b) Acetylene black@Re-S.

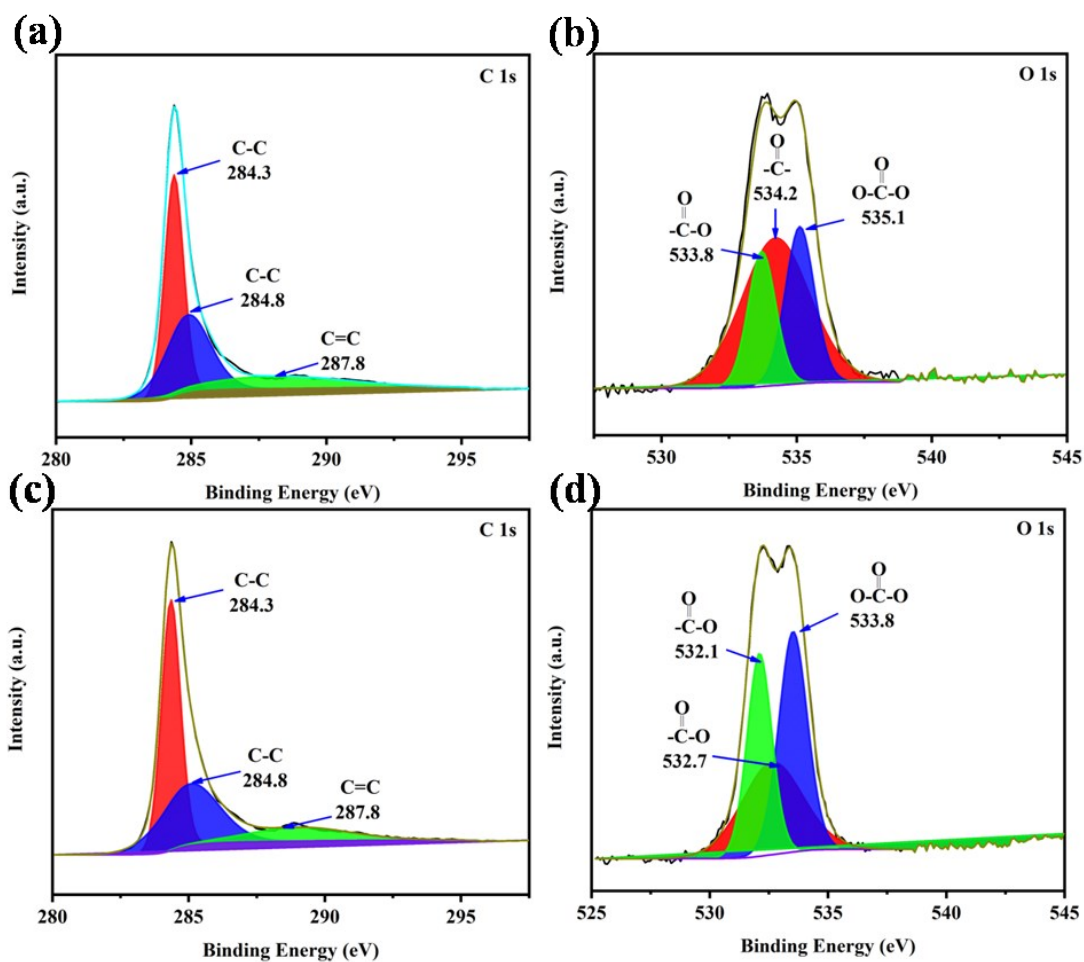

**Fig. S6** XPS spectrum of Acetylene black before (a), (b) and after (c), (d) disposing with EDA solution.

**Table S1.** The proportion of C and O binding species.

| Sample              | C-C   | C=C   | $\begin{array}{c} \text{O} \\ \parallel \\ \text{-C-O} \end{array}$ | $\begin{array}{c} \text{O} \\ \parallel \\ \text{-C-} \end{array}$ | $\begin{array}{c} \text{O} \\ \parallel \\ \text{O-C-O} \end{array}$ |
|---------------------|-------|-------|---------------------------------------------------------------------|--------------------------------------------------------------------|----------------------------------------------------------------------|
| Acetylene black     | 81.1% | 18.9% | 24.7%                                                               | 54.9%                                                              | 20.4%                                                                |
| Acetylene black-EDA | 79.1% | 20.9% | 70.3%                                                               | 0                                                                  | 29.7%                                                                |

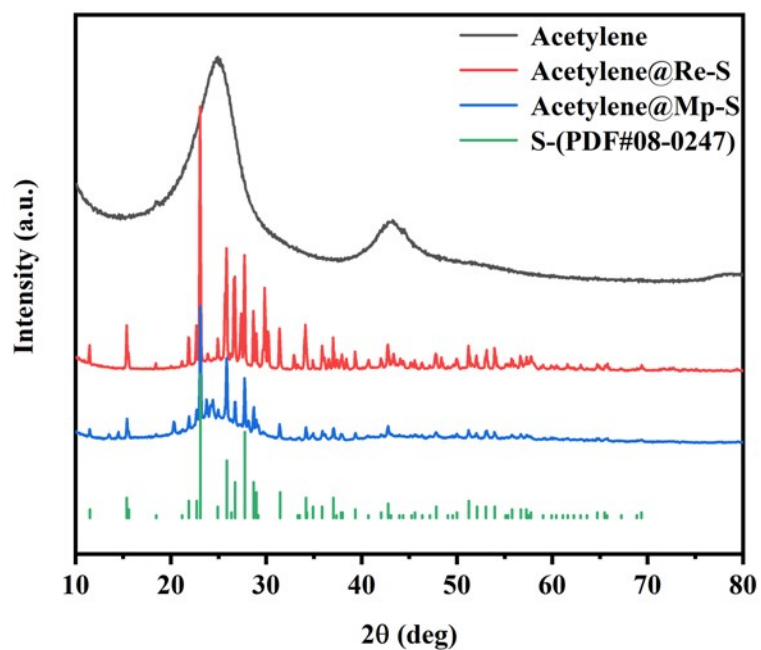

**Fig. S7** XRD patterns of Acetylene black, Acetylene black@Re-S, Acetylene black@Mp-S, and pristine S.

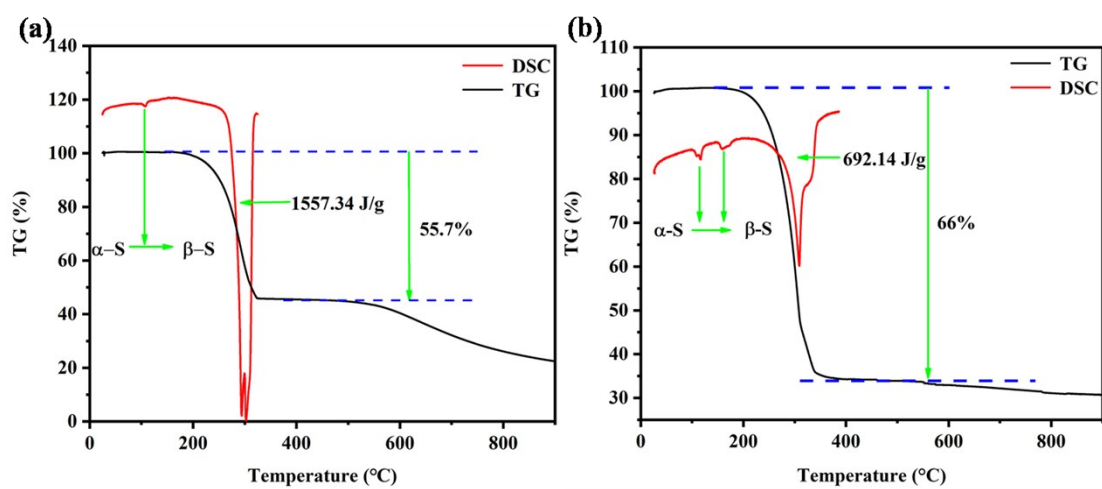

**Fig. S8** (a) TG and DSC curves of Acetylene black@Mp-S. (b) TG and DSC curves of Acetylene black@Re-S.

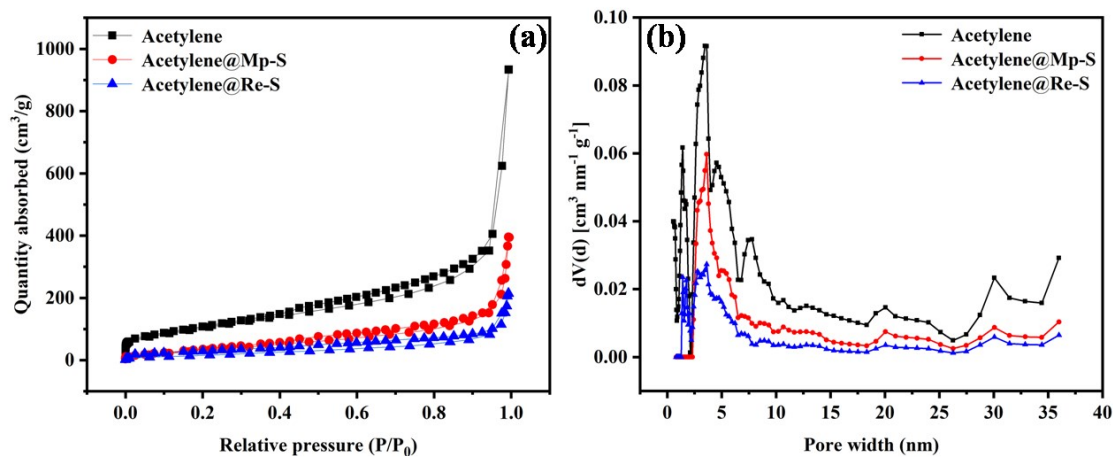

**Fig. S9** (a) Nitrogen adsorption-desorption isotherms, and (b) pore size distribution obtained using DFT method of Acetylene black, Acetylene black@Mp-S, and Acetylene black@Re-S.

**Table S2.** The specific surface area and pore volume of Acetylene black, Acetylene black@Mp-S, and Acetylene black@Re-S were measured by Brunauer–Emmett–Teller theory with the  $P/P_0$  range from 0.00001 to 0.1.

| Sample               | Specific surface area [ $\text{m}^2 \text{g}^{-1}$ ] |       | Pore volume [ $\text{cm}^3 \text{g}^{-1}$ ] | Micropore content [%] |
|----------------------|------------------------------------------------------|-------|---------------------------------------------|-----------------------|
|                      | BET                                                  | DFT   |                                             |                       |
| Acetylene black      | 377.6                                                | 285.9 | 0.739                                       | 0                     |
| Acetylene black@Mp-S | 144.7                                                | 90.0  | 0.316                                       | 0                     |
| Acetylene black@Re-S | 66.3                                                 | 64.5  | 0.183                                       | 0                     |

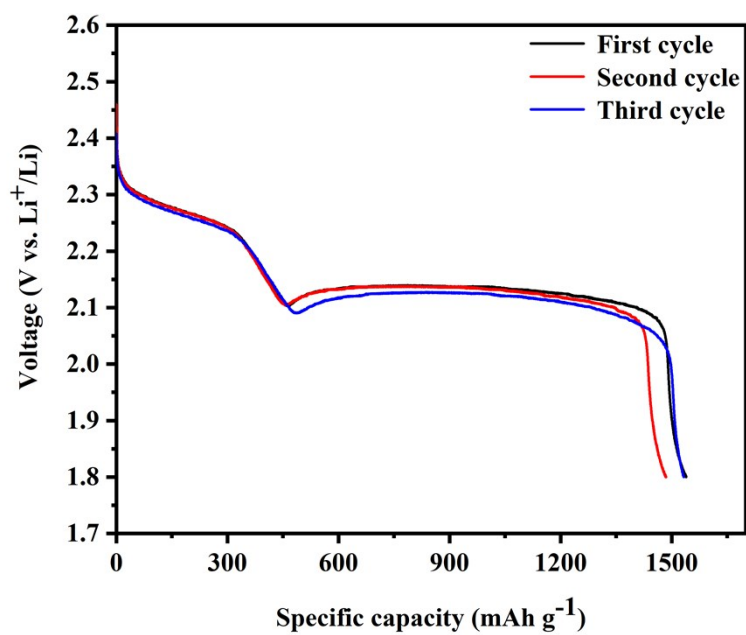

**Fig. S10** Galvanostatic discharge curve of Acetylene black@Re-S with conductive agent.

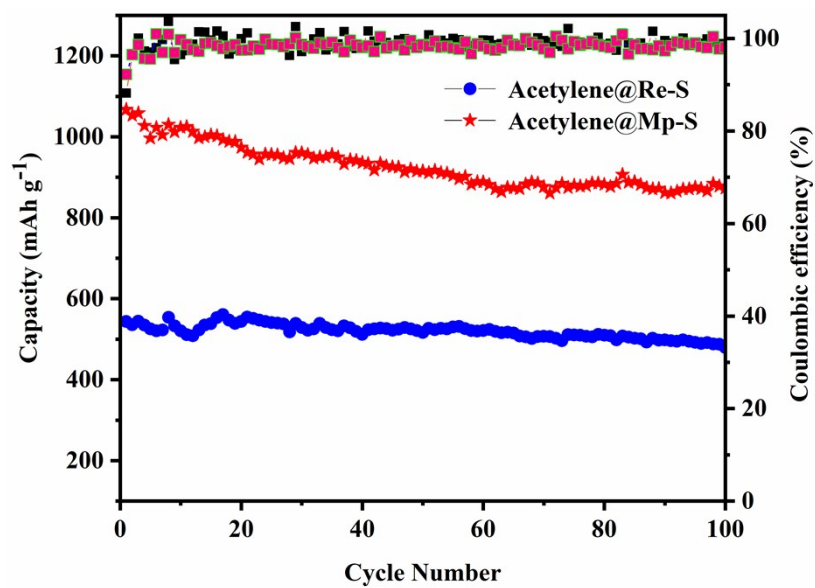

**Fig. S11** Long-term cycling performance of Acetylene black@Mp-S, and Acetylene black@Re-S.

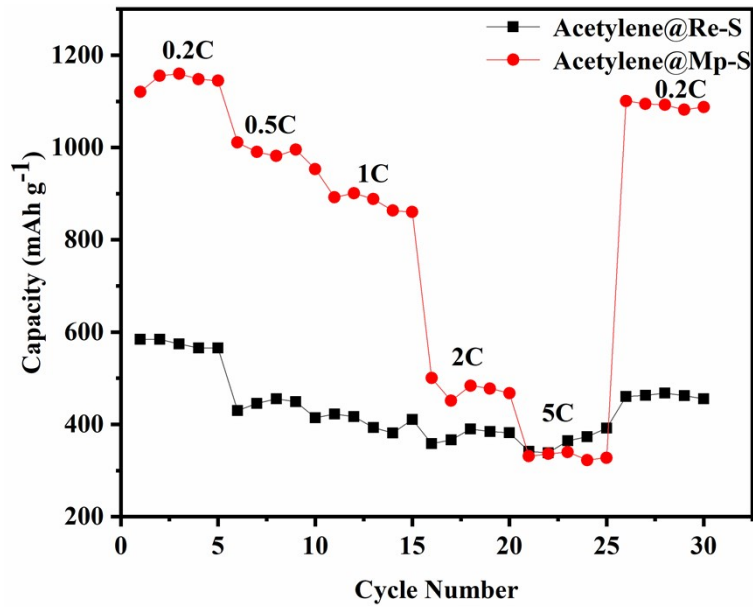

**Fig. S12** Rate performance of pristine Acetylene black@Mp-S, and Acetylene black@Re-S.

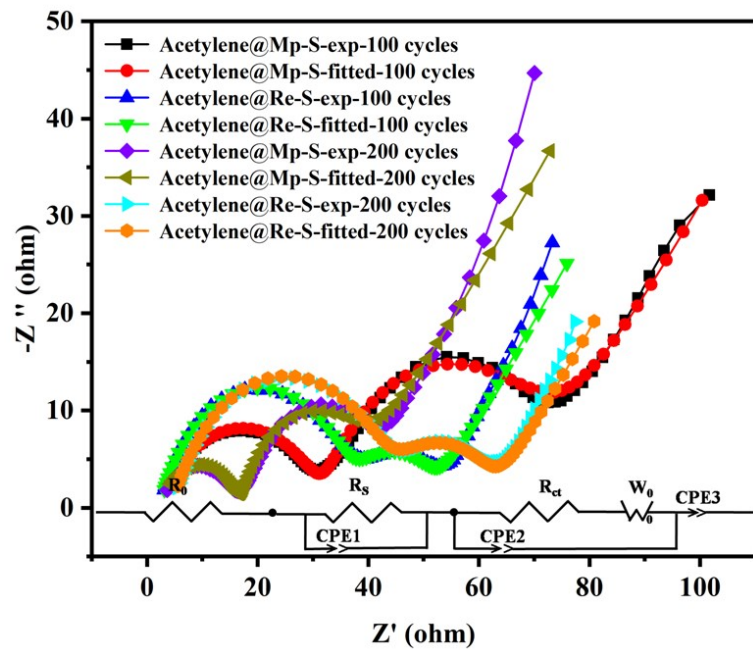

**Fig. S13** Electrochemical impedance spectroscopy was tested after 100 and 200 cycles for Acetylene black@Mp-S and Acetylene black@Re-S.



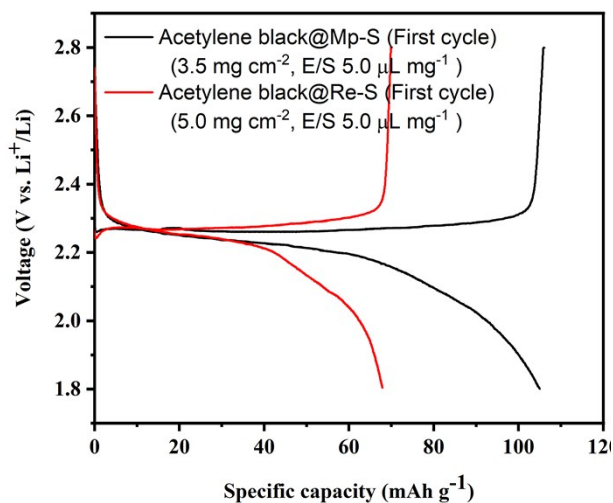

**Fig. S14** High areal S loading and low E/S ratio measurement for both of Acetylene black@Mp-S, Acetylene black@Re-S.

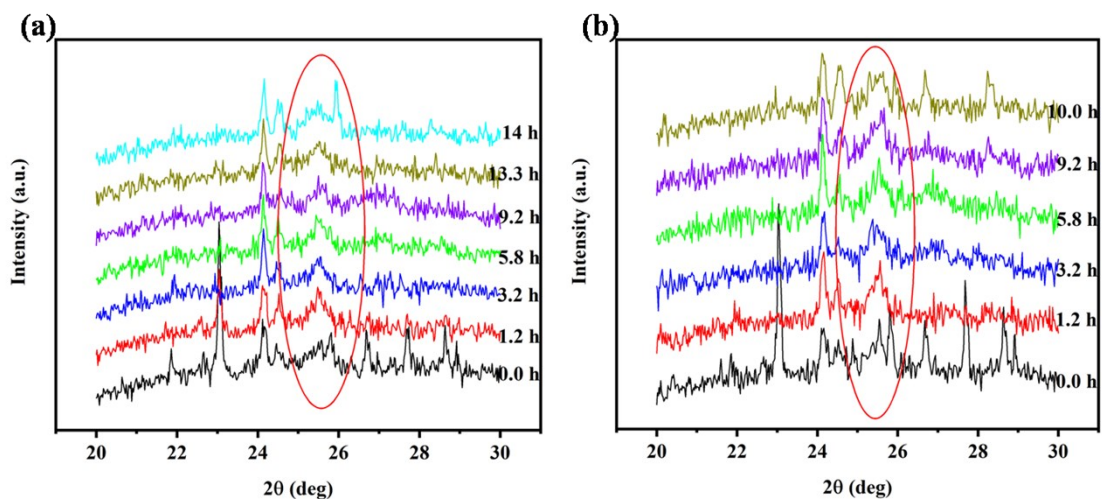

**Fig. S15** The peaks of polysulfides in a red ring of  $25.56^\circ$ . (a) Acetylene black@Mp-S cathode, (b) Acetylene black@Re-S cathode.
